# Supplementary material for: PeMYB26, an R2R3-MYB transcription factor, positively regulates Lignin deposition in Moso bamboo
Source: Research Square preprint supplement (doi:10.21203/rs.3.rs-3495971/v1), 2024-01-25
Supplement: Supplementary file 1 [file f4a4be93b723d5aa807fbbf7.docx]

**Supprot Information**

**Article Title: PeMYB26, an R2R3-MYB transcription factor, positively regulates Lignin deposition in Moso bamboo**

Submitted to *Plant Growth Regulation*

Author names: Boya Wang, Sen Chen, Ze Zhu, Yuan Li, Chaopeng Li, Yue Zhang, Yan Huang, Gang Xu, Xin Zhao, Ying Cao*, Shanglian Hu*

Affiliation: School of Life and Engineering, Southwest University of Science and Technology, Mianyang, 621010, China

E-mail: [578404755@qq.com](mailto:578404755@qq.com); 928316501@qq.com


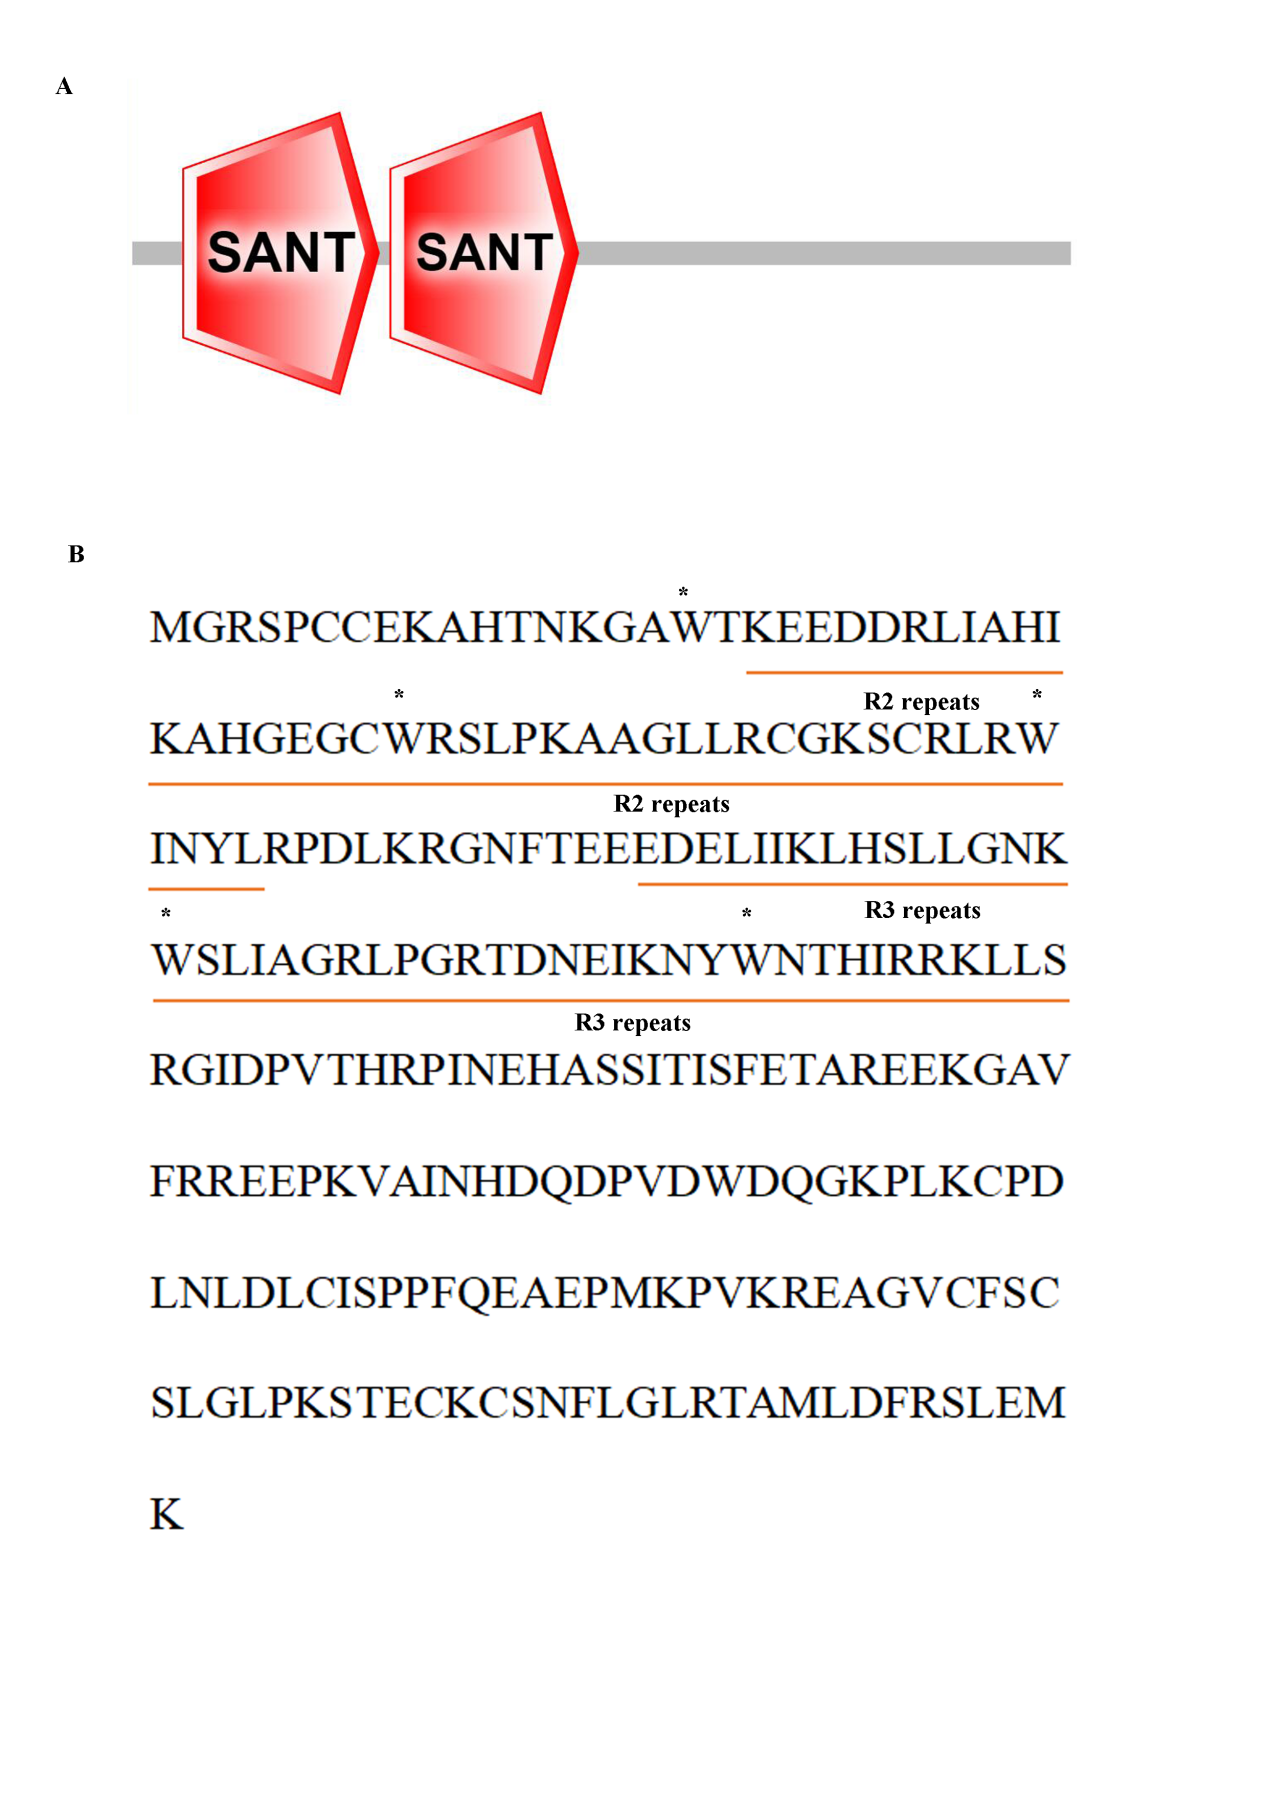
**Supplement Fig 1** Sequence analysis of PeMYB26. **a** Domain predication used online database SMART ((https://smart.embl.de/). **b** Conserved R2 and R3 repeats in PeMYB26 amino acid sequence.


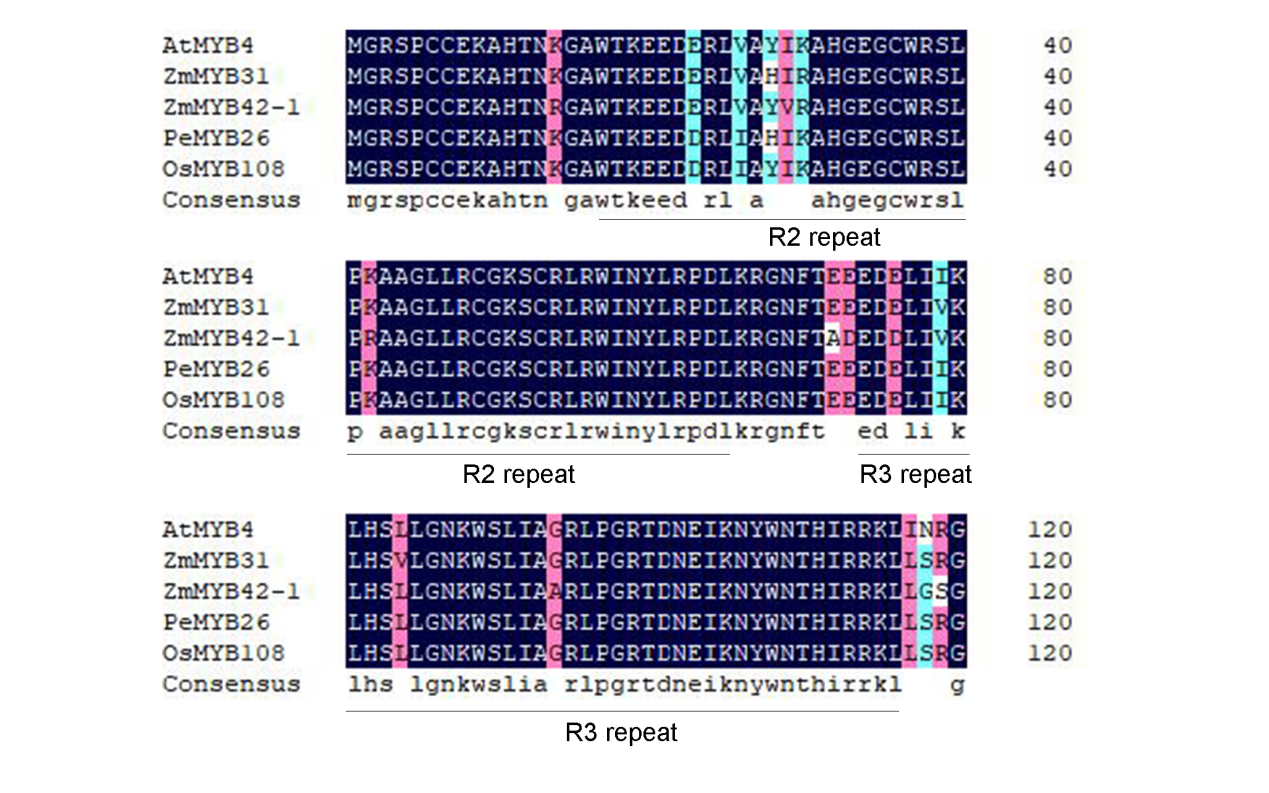


**Supplement Fig 2** Partial amino acid alignment of PeMYB26 and highly homologous crop proteins.

| Gene | Primer sequence |
| --- | --- |
| PeM140-Xba1-F | 5'-GCTCTAGAATGGGGAGGTCGCC-3' |
| PeM140-Kpn I-R | 5'-CGGGGTACCTCATTTCATTTCAAGGCTTCT-3' |
| PeM140-Sma1-R | 5'-TCCCCCGGGTTTCATTTCAAGGCTTCTGAAGT-3' |
| PeM140-Nco1-F | 5'-CATGCCATGGATGGGGAGGTCGCCG-3' |
| PeM140-Sal1（TGA）-R | 5'-ACGCGTCGACTCATTTCATTTCAAGGCTTCTG-3' |
| qPeTIP40-F | 5'-AAAATCATTGTAGGCCATTGTCG-3' |
| PeTIP40-R | 5'-ACTAAATTAAGCCAGCGGGAGTG-3' |
| qPeM140-F | 5'-TCAAGTGCCCAGACCTCAAC-3' |
| qPeM140-R | 5'-TCATTTCATTTCAAGGCTTC-3' |
| Actin-F | 5'-ATGTCGACAACGGCTCCGGCATGT-3' |
| Actin-R | 5'-GCTCGGGCACGACAGCACAGCTT-3' |
| qNtPAL-F | 5'-GCGATAGACTTGAGGCATTTG-3' |
| qNtPAL-R | 5'-CTTAGTTTCTGCATCAGTGGGT-3' |
| qNtCOMT-F | 5'-GAAGGTGATAATAGCGGAGTGC-3' |
| qNtCOMT-F | 5'-GAAGGTGATAATAGCGGAGTGC-3' |
| qNtCAD-F | 5'-TGTCTACACTGATGGCAAACCC-3' |
| qNtCAD-R | 5'-GTGTCCCACTCCTCCTAATCCC-3' |
| qNtCCR-F | 5'-CTAAAGGATTTGGGTCTGGAGT-3' |
| qNt-CCR-R | 5'-AATTTCTAGGTGCATTTGGTCT-3' |
| PeCCRpromoter-F | 5'-GACAGTTAATGCCACTTGACGA-3' |
| PeCCRpromoter-R | 5'-GAACAGTGGAGTGGTGATGAAG-3' |
| proPeCCR-Hind3-F | 5'-CCCAAGCTTACAGTTAATGCCACTTGACG-3' |
| proPeCCR-Nco1-R | 5'-CATGCCATGGCTTGATTCAGCACTCACTA-3' |

**Supplement Table 1** Primers sequence used in the article.
